# Supplementary material for: No benefit of flat head positioning in early moderate–severe acute ischaemic stroke: a HeadPoST study subgroup analysis
Source: PubMed Central journal article supplement — Stroke Vasc Neurol. 2020 Jun 25;5(4):406–9. doi: 10.1136/svn-2020-000387 (PMC7804058; doi:10.1136/svn-2020-000387), 2020-06-25
Supplement: svn-2020-000387supp001.pdf [file svn-2020-000387supp001.pdf]

Supplemental Figure 1. Patients flow chart

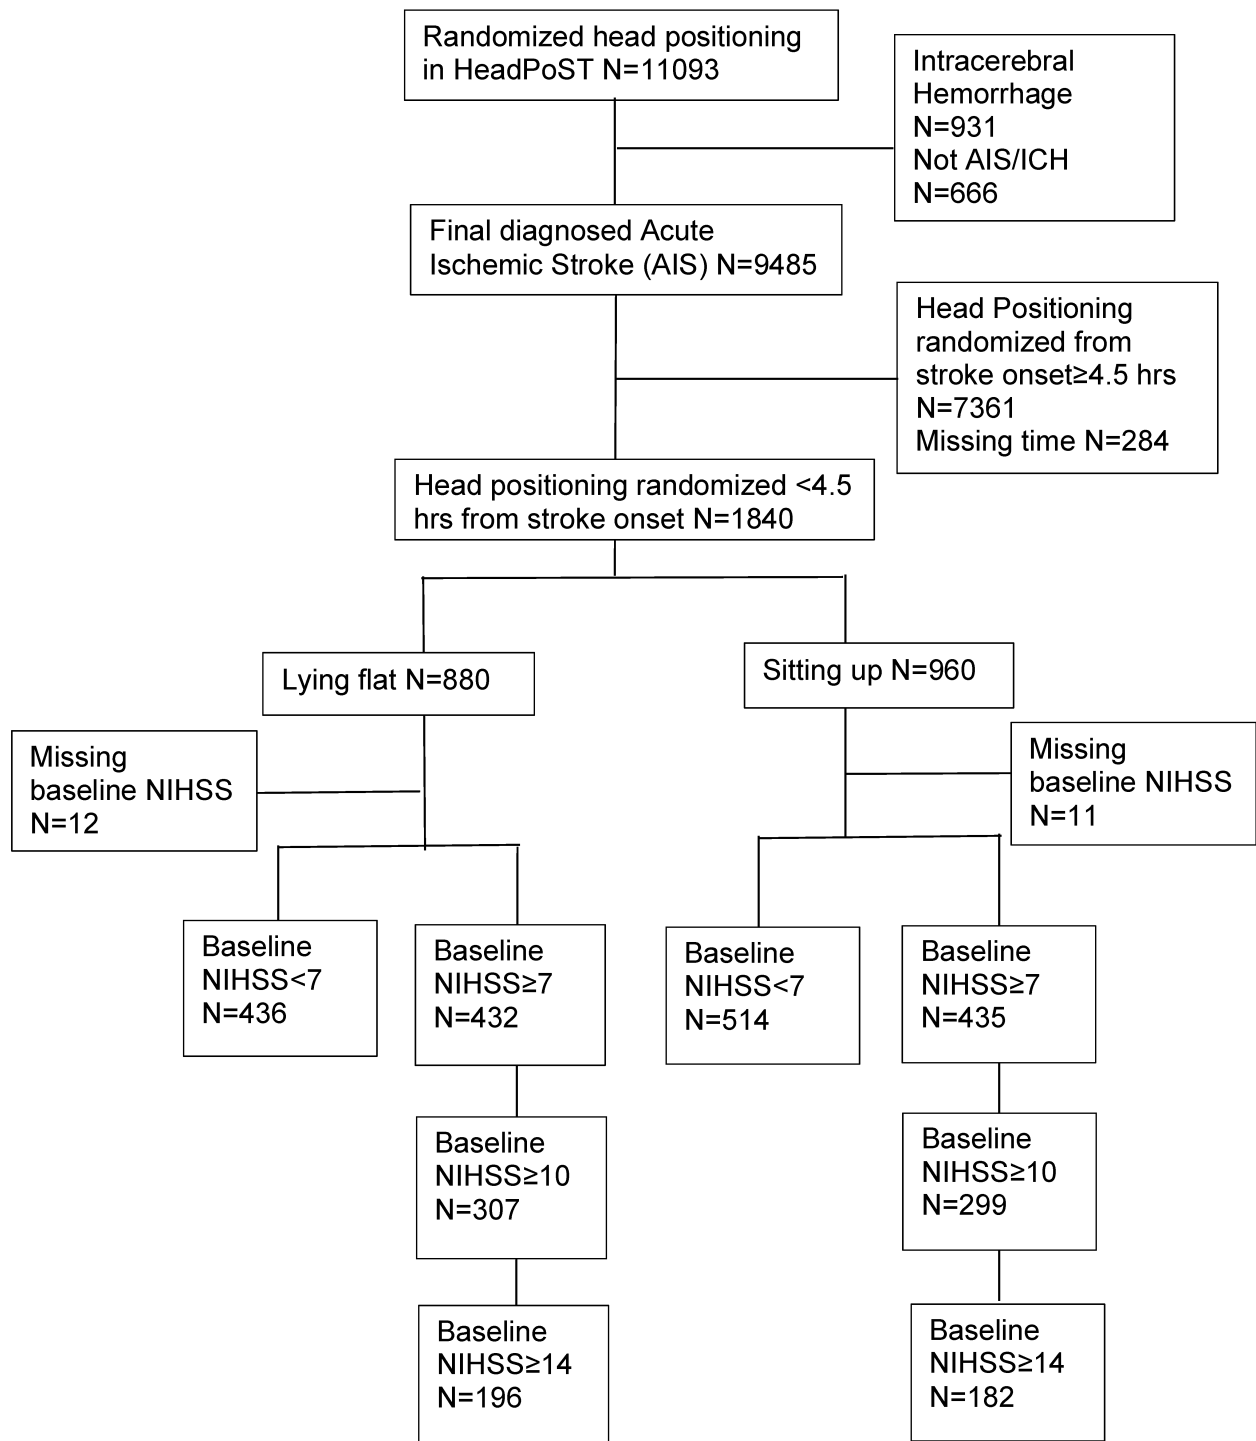

## Supplemental Figure 2. Subgroup analysis of ordinal mRS outcome by LVO in NIHSS cohorts

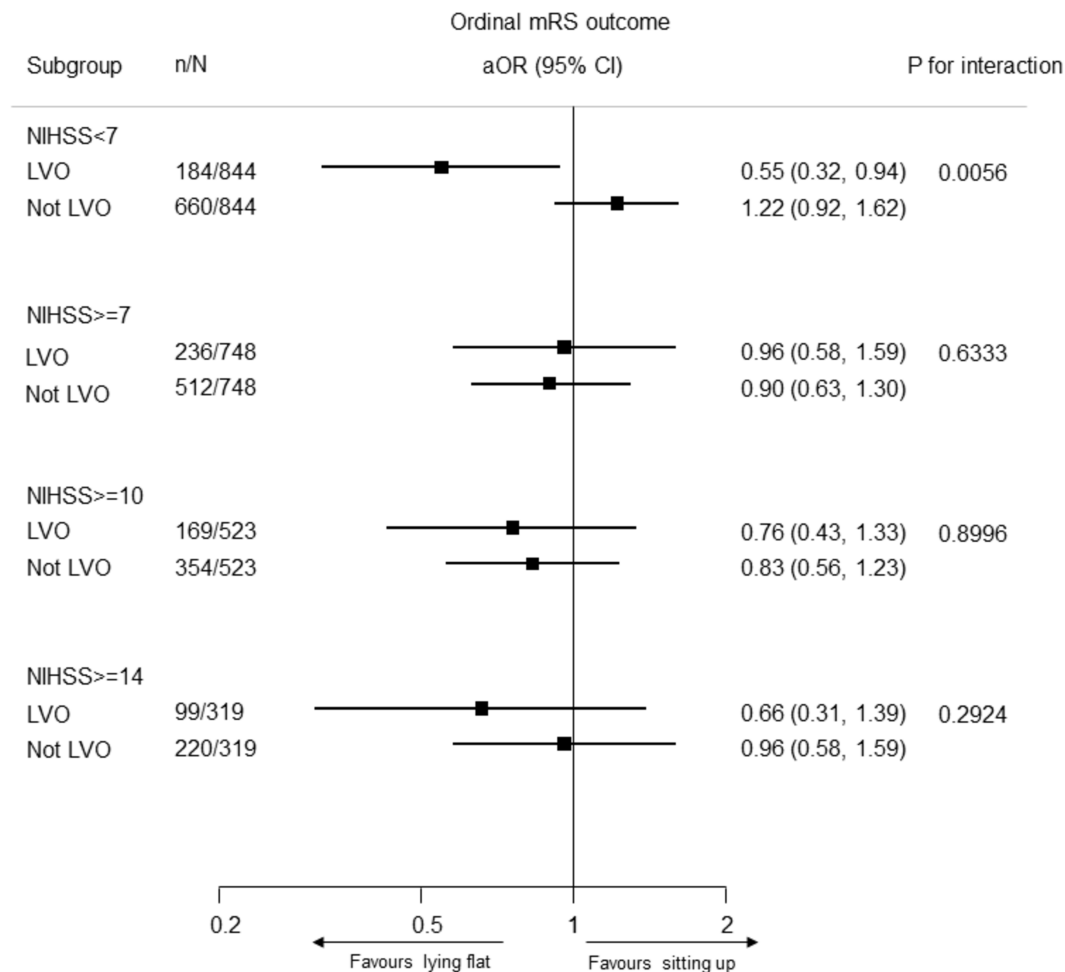

Note: aOR denotes adjusted odds ratio, mRS modified rankin scale, NIHSS national institute of health stroke scale, LVO large vessel occlusion Hierarchical mixed model adjusted study design, age, sex, NIHSS at baseline as continuous, pre-morbid function according to mRS and medical history of heart disease, stroke or diabetes mellitus.

**Supplemental Table 1: Baseline characteristics by head positioning within 4.5 hours from stroke onset and NIHSS <7 points**

| <b>Baseline characteristics</b>  | <b>Lying flat<br/>N=436</b> | <b>Sitting up<br/>N=514</b> | <b>P value</b> |
|----------------------------------|-----------------------------|-----------------------------|----------------|
| <b>Age (years)</b>               | 67.7 (13.3)                 | 68.1 (12.5)                 | 0.56           |
| <b>Male</b>                      | 274 (62.8%)                 | 336 (65.4%)                 | 0.42           |
| <b>Region, n(%)</b>              |                             |                             | 0.18           |
| Australia and UK                 | 217 (49.8%)                 | 279 (54.3%)                 |                |
| China and Taiwan                 | 167 (38.3%)                 | 190 (37.0%)                 |                |
| India and Sri Lanka              | 9 (2.1%)                    | 4 (0.8%)                    |                |
| South America                    | 43 (9.9%)                   | 41 (8.0%)                   |                |
| <b>Hypertension, n(%)</b>        | 257 (58.9%)                 | 326 (63.5%)                 | 0.15           |
| <b>Previous stroke, n(%)</b>     | 99 (22.8%)                  | 114 (22.2%)                 | 0.83           |
| <b>Atrial fibrillation, n(%)</b> | 45 (10.4%)                  | 58 (11.3%)                  | 0.64           |
| <b>Heart failure, n(%)</b>       | 7 (1.6%)                    | 16 (3.1%)                   | 0.13           |
| <b>Diabetes Mellitus, n(%)</b>   | 89 (20.4%)                  | 114 (22.2%)                 | 0.50           |
| <b>Current smoker, n(%)</b>      | 79 (18.5%)                  | 108 (21.4%)                 | 0.27           |
| <b>Aspirin use, n(%)</b>         | 174 (39.9%)                 | 235 (45.8%)                 | 0.07           |
| <b>Anticoagulant use, n(%)</b>   | 33 (7.6%)                   | 52 (10.1%)                  | 0.17           |
| <b>AIS category, n(%)</b>        |                             |                             | 0.53           |
| Large Vessel                     | 90 (20.6%)                  | 125 (24.3%)                 |                |
| Cardioembolic                    | 61 (14.0%)                  | 68 (13.2%)                  |                |
| Lacunar                          | 153 (35.1%)                 | 164 (31.9%)                 |                |
| Other                            | 132 (30.3%)                 | 157 (30.5%)                 |                |
| <b>NIHSS at admission</b>        | 3.0 (2.0, 5.0)              | 3.0 (2.0, 5.0)              | 0.71           |
| <b>mRS, n(%)</b>                 |                             |                             | 0.97           |
| 0 (no symptoms)                  | 285 (65.4%)                 | 336 (65.4%)                 |                |
| 1 (no significant disability)    | 83 (19.0%)                  | 100 (19.5%)                 |                |
| 2 (slight disability)            | 44 (10.1%)                  | 46 (8.9%)                   |                |
| 3 (moderate disability)          | 19 (4.4%)                   | 25 (4.9%)                   |                |
| 4 (moderate/severe disability)   | 5 (1.1%)                    | 7 (1.4%)                    |                |
| 5 (severe disability)            | 0 (0.0%)                    | 0 (0.0%)                    |                |

*Note: AIS denotes Acute Ischaemic Stroke, IQR interquartile range, mRS modified Rankin Scale, NIHSS National Institution of Health Stroke Scale, SD standard deviation*

**Supplemental Table 2: Baseline characteristics by head positioning within 4.5 hours from stroke onset and NIHSS  $\geq$  10 points**

| Baseline characteristics         | Lying flat<br>N=307 | Sitting up<br>N=299 | P value |
|----------------------------------|---------------------|---------------------|---------|
| <b>Age (years)</b>               | 74.4 (13.0)         | 73.8 (13.8)         | 0.55    |
| Male                             | 148 (48.2%)         | 141 (47.2%)         | 0.80    |
| <b>Region, n(%)</b>              |                     |                     | 0.10    |
| Australia and UK                 | 219 (71.3%)         | 191 (63.9%)         |         |
| China and Taiwan                 | 56 (18.2%)          | 71 (23.7%)          |         |
| India and Sri Lanka              | 8 (2.6%)            | 4 (1.3%)            |         |
| South America                    | 24 (7.8%)           | 33 (11.0%)          |         |
| <b>Hypertension, n(%)</b>        | 210 (69.1%)         | 184 (61.5%)         | 0.05    |
| <b>Previous stroke, n(%)</b>     | 70 (22.9%)          | 72 (24.1%)          | 0.73    |
| <b>Atrial fibrillation, n(%)</b> | 77 (25.4%)          | 71 (23.9%)          | 0.67    |
| <b>Heart failure, n(%)</b>       | 27 (8.9%)           | 24 (8.1%)           | 0.72    |
| <b>Diabetes Mellitus, n(%)</b>   | 65 (21.2%)          | 45 (15.1%)          | 0.05    |
| <b>Current smoker, n(%)</b>      | 35 (11.7%)          | 39 (13.1%)          | 0.60    |
| <b>Aspirin use, n(%)</b>         | 94 (30.7%)          | 101 (33.8%)         | 0.42    |
| <b>Anticoagulant use, n(%)</b>   | 46 (15.0%)          | 33 (11.1%)          | 0.15    |
| <b>AIS category, n(%)</b>        |                     |                     | 0.80    |
| Large Vessel                     | 101 (32.9%)         | 92 (30.8%)          |         |
| Cardioembolic                    | 86 (28.0%)          | 80 (26.8%)          |         |
| Lacunar                          | 25 (8.1%)           | 30 (10.0%)          |         |
| Other/uncertain                  | 95 (30.9%)          | 97 (32.4%)          |         |
| <b>NIHSS at admission</b>        | 16.0 (12.0, 20.0)   | 15.0 (12.0, 21.0)   | 0.55    |
| <b>mRS, n(%)</b>                 |                     |                     | 0.90    |
| 0 (no symptoms)                  | 162 (53.3%)         | 155 (52.2%)         |         |
| 1 (no significant disability)    | 60 (19.7%)          | 56 (18.9%)          |         |
| 2 (slight disability)            | 31 (10.2%)          | 31 (10.4%)          |         |
| 3 (moderate disability)          | 31 (10.2%)          | 33 (11.1%)          |         |
| 4 (moderate/severe disability)   | 18 (5.9%)           | 17 (5.7%)           |         |
| 5 (severe disability)            | 2 (0.7%)            | 5 (1.7%)            |         |

Note: AIS denotes Acute Ischaemic Stroke, IQR interquartile range, mRS modified Rankin Scale, NIHSS National Institution of Health Stroke Scale, SD standard deviation

**Supplemental Table 3: Baseline characteristics by head positioning within 4.5 hours from stroke onset and NIHSS  $\geq$  14 points**

| Baseline characteristics         | Lying flat<br>N=196 | Sitting up<br>N=182 | P value |
|----------------------------------|---------------------|---------------------|---------|
| <b>Age (years)</b>               | 75.5 (12.7)         | 75.1 (14.1)         | 0.79    |
| Male                             | 87 (44.4%)          | 84 (46.2%)          | 0.74    |
| <b>Region, n(%)</b>              |                     |                     | 0.16    |
| Australia and UK                 | 148 (75.5%)         | 120 (65.9%)         |         |
| China and Taiwan                 | 29 (14.8%)          | 35 (19.2%)          |         |
| India and Sri Lanka              | 5 (2.6%)            | 4 (2.2%)            |         |
| South America                    | 14 (7.1%)           | 23 (12.6%)          |         |
| <b>Hypertension, n(%)</b>        | 134 (69.1%)         | 116 (63.7%)         | 0.28    |
| <b>Previous stroke, n(%)</b>     | 42 (21.5%)          | 47 (25.8%)          | 0.33    |
| <b>Atrial fibrillation, n(%)</b> | 46 (23.8%)          | 47 (26.1%)          | 0.61    |
| <b>Heart failure, n(%)</b>       | 19 (9.8%)           | 16 (8.9%)           | 0.76    |
| <b>Diabetes Mellitus, n(%)</b>   | 45 (23.1%)          | 28 (15.4%)          | 0.06    |
| <b>Current smoker, n(%)</b>      | 17 (8.9%)           | 25 (13.9%)          | 0.13    |
| <b>Aspirin use, n(%)</b>         | 62 (31.8%)          | 60 (33.0%)          | 0.81    |
| <b>Anticoagulant use, n(%)</b>   | 28 (14.4%)          | 20 (11.0%)          | 0.33    |
| <b>AIS category, n(%)</b>        |                     |                     | 0.78    |
| Large Vessel                     | 63 (32.1%)          | 54 (29.7%)          |         |
| Cardioembolic                    | 61 (31.1%)          | 53 (29.1%)          |         |
| Lacunar                          | 12 (6.1%)           | 15 (8.2%)           |         |
| Other                            | 60 (30.6%)          | 60 (33.0%)          |         |
| <b>NIHSS at admission</b>        | 19.0 (16.0, 22.0)   | 19.0 (16.0, 23.0)   | 0.70    |
| <b>mRS, n(%)</b>                 |                     |                     | 0.48    |
| 0 (no symptoms)                  | 94 (48.5%)          | 90 (49.7%)          |         |
| 1 (no significant disability)    | 43 (22.2%)          | 31 (17.1%)          |         |
| 2 (slight disability)            | 17 (8.8%)           | 22 (12.2%)          |         |
| 3 (moderate disability)          | 25 (12.9%)          | 23 (12.7%)          |         |
| 4 (moderate/severe disability)   | 14 (7.2%)           | 11 (6.1%)           |         |
| 5 (severe disability)            | 1 (0.5%)            | 4 (2.2%)            |         |

Note: AIS denotes Acute Ischaemic Stroke, IQR interquartile range, mRS modified Rankin Scale, NIHSS National Institution of Health Stroke Scale, SD standard deviation
